# Supplementary material
Source: publisher site journal article supplement (https://www.dovepress.com/get_supplementary_file.php?f=338074.docx)
Supplement: Supplementary file 1 [file get_supplementary_file.php]

**Appendix Ⅰ**

**Details of the Literature Search Strategy**

(1) PubMed （1977 to Dec 29, 2020）

| **Search** | **Query** | **Items found** |
| --- | --- | --- |
| #1 | **((((((((((((((COPD[MeSH Terms]) OR (pulmonary disease, chronic obstructive[MeSH Terms])) OR (Lung Diseases, Obstructive[MeSH Terms])) OR (Chronic Obstructive Pulmonary Disease[Title/Abstract])) OR (Chronic Obstructive Pulmonary Diseases[Title/Abstract])) OR (Chronic Obstructive lung Disease[Title/Abstract])) OR (COPD[Title/Abstract])) OR (COAD[Title/Abstract])) OR (pulmonary disease, chronic obstructive[Title/Abstract])) OR (Chronic Obstructive Airway Disease[Title/Abstract])) OR (Chronic Airflow Obstruction[Title/Abstract])) OR (Chronic Airflow Obstructions[Title/Abstract])) OR (Airflow Obstruction, Chronic[Title/Abstract])) OR (Airflow Obstruction, Chronics[Title/Abstract])) OR (Lung Diseases, Obstructive[Title/Abstract])** Sort by: **Most Recent** | 243058 |
| #2 | **((((((((((Symptom Flare Up[MeSH Terms]) OR (inpatient[MeSH Terms])) OR (hospital patient[Title/Abstract])) OR (recurrent disease[Title/Abstract])) OR (Acute exacerbation[Title/Abstract])) OR (Symptom Flare Up[Title/Abstract])) OR (acute management[Title/Abstract])) OR (inpatients[Title/Abstract])) OR (inpatient[Title/Abstract])) OR (hospital admission[Title/Abstract])) OR (infective exacerbation[Title/Abstract]) Sort by: Most Recent** | 189080 |
| #3 | **#1 and #2** | 7307 |
| #4 | (((acute exacerbation of chronic obstructive pulmonary disease [Title/Abstract]) OR (AECOPD[Title/Abstract])) OR (acute exacerbation of COPD[Title/Abstract])) OR (exacerbation of COPD[Title/Abstract]) Sort by: Most Recent | 2769 |
| #5 | #3 or #4 | 7963 |
| #6 | (((((((((((((((((((((((((((((((((((((((((((((((((((((((((((((((((rehabilitation[MeSH Terms]) OR (exercise therapy[MeSH Terms])) OR (exercise[MeSH Terms])) OR (breathing exercises[MeSH Terms])) OR (walking[MeSH Terms])) OR (resistance training[MeSH Terms])) OR (endurance training[MeSH Terms])) OR (muscle stretching exercises[MeSH Terms])) OR (physical therapy[MeSH Terms])) OR (education[MeSH Terms])) OR (self-management[MeSH Terms])) OR (Nutrition Support[MeSH Terms])) OR (nutrition supplement[MeSH Terms])) OR (nutrition therapy[MeSH Terms])) OR (Enteral nutrition[MeSH Terms])) OR (Parenteral nutrition[MeSH Terms])) OR (rehabilitation[Title/Abstract])) OR (pulmonary rehabilitation[Title/Abstract])) OR (respiratory rehabilitation[Title/Abstract])) OR (Rehabilitation therapy[Title/Abstract])) OR (exercise therapy[Title/Abstract])) OR (rehabilitation training[Title/Abstract])) OR (rehabilitation program[Title/Abstract])) OR (kinesiotherapy[Title/Abstract])) OR (exercise[Title/Abstract])) OR (exercise training[Title/Abstract])) OR (breathing exercises[Title/Abstract])) OR (breathing exercise[Title/Abstract])) OR (breathing technique[Title/Abstract])) OR (exercise program[Title/Abstract])) OR (walking[Title/Abstract])) OR (aerobic training[Title/Abstract])) OR (resistance training[Title/Abstract])) OR (balance training[Title/Abstract])) OR (Strength Training[Title/Abstract])) OR (physical training[Title/Abstract])) OR (endurance training[Title/Abstract])) OR (muscle stretching exercises[Title/Abstract])) OR (stretching exercise[Title/Abstract])) OR (stretch training[Title/Abstract])) OR (upper limb training[Title/Abstract])) OR (interval training[Title/Abstract])) OR (Inspiratory Muscle Training[Title/Abstract])) OR (Flexibility Training[Title/Abstract])) OR (Neuromuscular Electrical Stimulation[Title/Abstract])) OR (implantable neurostimulator[Title/Abstract])) OR (physiotherapy[Title/Abstract])) OR (physical therapy[Title/Abstract])) OR (respiratory physiotherapy[Title/Abstract])) OR (respiratory physical therapy[Title/Abstract])) OR (airway clearance[Title/Abstract])) OR (lung clearance[Title/Abstract])) OR (education[Title/Abstract])) OR (psychoeducation[Title/Abstract])) OR (psychosocial support[Title/Abstract])) OR (psychosocial care[Title/Abstract])) OR (self-management[Title/Abstract])) OR (self care[Title/Abstract])) OR (Nutrition Support[Title/Abstract])) OR (nutrition supplement[Title/Abstract])) OR (nutrition therapy[Title/Abstract])) OR (diet therapy[Title/Abstract])) OR (Nutritional intervention[Title/Abstract])) OR (Enteral nutrition[Title/Abstract])) OR (enteric feeding[Title/Abstract])) OR (Parenteral nutrition[Title/Abstract]) Sort by: Most Recent | 205863 |
| #7 | #5 AND #6 | 1268 |
| #8 | Search: ((((((randomized controlled trial) OR (RCTs)) OR (RCT)) OR (controlled clinical trial)) OR (randomization)) OR (randomized)) OR (randomly) Sort by: Most Recent | 1001136 |
| #9 | **#7 AND #8** | 367 |

(2) Embase (1974 to Dec 29, 2020)

| **Search** | **Query** | **Items found** |
| --- | --- | --- |
| #1 | 'chronic obstructive pulmonary diseases':ti,ab,kw OR 'chronic obstructive lung disease':ti,ab,kw OR 'chronic obstructive pulmonary disease':ti,ab,kw OR copd:ti,ab,kw OR coad:ti,ab,kw OR 'pulmonary disease, chronic obstructive':ti,ab,kw OR 'chronic obstructive airway disease':ti,ab,kw OR 'chronic airflow obstruction':ti,ab,kw OR 'chronic airflow obstructions':ti,ab,kw OR 'airflow obstruction, chronic':ti,ab,kw OR 'airflow obstruction, chronics':ti,ab,kw OR 'lung diseases, obstructive':ti,ab,kw | 123722 |
| #2 | 'hospital patient':ti,ab,kw OR 'recurrent disease':ti,ab,kw OR 'acute exacerbation':ti,ab,kw OR 'symptom flare up':ti,ab,kw OR 'acute management':ti,ab,kw OR inpatients:ti,ab,kw OR inpatient:ti,ab,kw OR 'hospital admission':ti,ab,kw OR 'infective exacerbation':ti,ab,kw | 286625 |
| #3 | #1 AND #2 | 9028 |
| #4 | 'acute exacerbation of chronic obstructive pulmonary disease':ti,ab,kw OR aecopd:ti,ab,kw OR 'acute exacerbation of copd':ti,ab,kw OR 'exacerbation of copd':ti,ab,kw | 5293 |
| #5 | #3 OR #4 | 10726 |
| #6 | rehabilitation:ti,ab,kw OR 'pulmonary rehabilitation':ti,ab,kw OR 'respiratory rehabilitation':ti,ab,kw OR 'rehabilitation therapy':ti,ab,kw OR 'exercise therapy':ti,ab,kw OR 'rehabilitation training':ti,ab,kw OR 'rehabilitation program':ti,ab,kw OR kinesiotherapy:ti,ab,kw OR exercise:ti,ab,kw OR 'exercise training':ti,ab,kw OR 'breathing exercise':ti,ab,kw OR 'breathing exercises':ti,ab,kw OR 'breathing technique':ti,ab,kw OR 'exercise program':ti,ab,kw OR walking:ti,ab,kw OR 'aerobic training':ti,ab,kw OR 'resistance training':ti,ab,kw OR 'balance training':ti,ab,kw OR 'strength training':ti,ab,kw OR training:ti,ab,kw OR 'physical training':ti,ab,kw OR 'endurance training':ti,ab,kw OR 'muscle stretching exercises':ti,ab,kw OR 'stretching exercise':ti,ab,kw OR 'stretch training':ti,ab,kw OR 'upper limb training':ti,ab,kw OR 'interval training':ti,ab,kw OR 'inspiratory muscle training':ti,ab,kw OR 'flexibility training':ti,ab,kw OR 'implantable neurostimulator':ti,ab,kw OR 'neuromuscular electrical stimulation':ti,ab,kw OR physiotherapy:ti,ab,kw OR 'physical therapy':ti,ab,kw OR 'respiratory physiotherapy':ti,ab,kw OR 'respiratory physical therapy':ti,ab,kw OR 'lung clearance':ti,ab,kw OR 'airway clearance':ti,ab,kw OR education:ti,ab,kw OR psychoeducation:ti,ab,kw OR 'psychosocial care':ti,ab,kw OR 'psychosocial support':ti,ab,kw OR 'self-care':ti,ab,kw OR 'self management':ti,ab,kw OR 'nutrition supplement':ti,ab,kw OR 'nutrition support':ti,ab,kw OR 'diet therapy':ti,ab,kw OR 'nutrition therapy':ti,ab,kw OR 'nutritional intervention':ti,ab,kw OR 'enteric feeding':ti,ab,kw OR 'enteral nutrition':ti,ab,kw OR 'parenteral nutrition':ti,ab,kw | 1829919 |
| #7 | #5 AND #6 | 1900 |
| #8 | 'randomized controlled trial' OR 'randomized controlled trial topic' OR rcts OR rct OR 'controlled clinical trial' OR randomization OR randomized OR randomly | 1222965 |
| #9 | #7 AND #8 | 410 |

(3) Cochrane Library (Dec 29, 2020)

| **Search** | **Query** | **Items found** |
| --- | --- | --- |
| #1 | (Chronic Obstructive Pulmonary Diseases):ti,ab,kw OR (Chronic Obstructive Pulmonary Disease):ti,ab,kw OR (Chronic Obstructive lung Disease):ti,ab,kw OR (COPD):ti,ab,kw OR (COAD):ti,ab,kw | 21737 |
| #2 | (pulmonary disease, chronic obstructive):ti,ab,kw OR (Chronic Obstructive Airway Disease):ti,ab,kw AND (Chronic Airflow Obstruction):ti,ab,kw OR (Chronic Airflow Obstructions):ti,ab,kw OR (Airflow Obstruction, Chronic):ti,ab,kw | 14277 |
| #3 | (Airflow Obstruction, Chronics):ti,ab,kw OR (Lung Diseases, Obstructive):ti,ab,kw | 4382 |
| #4 | #1 or #2 or #3 | 22129 |
| #5 | (hospital patient):ti,ab,kw OR (recurrent disease):ti,ab,kw OR (Acute exacerbation):ti,ab,kw OR (Symptom Flare Up):ti,ab,kw OR (acute management):ti,ab,kw | 93463 |
| #6 | (inpatients):ti,ab,kw OR (inpatient):ti,ab,kw OR (hospital admission):ti,ab,kw OR (infective exacerbation):ti,ab,kw | 34692 |
| #7 | #5 or #6 | 112090 |
| #8 | #4 and #7 | 3686 |
| #9 | (acute exacerbation of chronic obstructive pulmonary disease):ti,ab,kw OR (AECOPD):ti,ab,kw OR (acute exacerbation of COPD):ti,ab,kw OR (exacerbation of COPD):ti,ab,kw | 3819 |
| #10 | #8 or #9 | 5538 |
| #11 | (rehabilitation):ti,ab,kw OR (pulmonary rehabilitation):ti,ab,kw OR (respiratory rehabilitation):ti,ab,kw OR (Rehabilitation therapy):ti,ab,kw OR (exercise therapy):ti,ab,kw | 83891 |
| #12 | (rehabilitation training):ti,ab,kw OR (rehabilitation program):ti,ab,kw OR (kinesiotherapy):ti,ab,kw OR (exercise):ti,ab,kw OR (exercise training):ti,ab,kw | 113576 |
| #13 | (breathing exercises):ti,ab,kw OR (breathing exercise):ti,ab,kw OR (breathing technique):ti,ab,kw OR (exercise program):ti,ab,kw OR (walking):ti,ab,kw | 50586 |
| #14 | (aerobic training):ti,ab,kw OR (resistance training):ti,ab,kw OR (balance training):ti,ab,kw OR (Strength Training):ti,ab,kw OR (physical training):ti,ab,kw | 41045 |
| #15 | (endurance training):ti,ab,kw OR (muscle stretching exercises):ti,ab,kw OR (stretching exercise):ti,ab,kw OR (stretch training):ti,ab,kw OR (upper limb training):ti,ab,kw | 12061 |
| #16 | (interval training):ti,ab,kw OR (Inspiratory Muscle Training):ti,ab,kw OR (Neuromuscular Electrical Stimulation):ti,ab,kw OR (Flexibility Training):ti,ab,kw OR (implantable neurostimulator):ti,ab,kw | 11453 |
| #17 | (physiotherapy):ti,ab,kw OR (physical therapy):ti,ab,kw OR (respiratory physiotherapy):ti,ab,kw OR (respiratory physical therapy):ti,ab,kw OR (airway clearance):ti,ab,kw | 58583 |
| #18 | (lung clearance):ti,ab,kw OR (education):ti,ab,kw OR (psychoeducation):ti,ab,kw OR (psychosocial support):ti,ab,kw OR (psychosocial care):ti,ab,kw | 82052 |
| #19 | (self-management):ti,ab,kw OR (self care):ti,ab,kw OR (Nutrition Support):ti,ab,kw OR (nutrition supplement):ti,ab,kw OR (nutrition therapy):ti,ab,kw | 50057 |
| #20 | (diet therapy):ti,ab,kw OR (Nutritional intervention):ti,ab,kw OR (Enteral nutrition):ti,ab,kw OR (enteric feeding):ti,ab,kw OR (Parenteral nutrition):ti,ab,kw | 45281 |
| #21 | #11 or #12 or #13 or #14 or #15 or #16 or #17 or #18 or #19 or #20 | 306673 |
| #22 | #10 and #21 | 1777 |
| #23 | (randomized controlled trial):ti,ab,kw OR (RCTs):ti,ab,kw OR (RCT):ti,ab,kw OR (controlled clinical trial):ti,ab,kw OR (randomization):ti,ab,kw | 680803 |
| #24 | (randomized):ti,ab,kw OR (randomly):ti,ab,kw | 1029138 |
| #25 | #23 or #24 | 1084247 |
| #26 | #22 and #25 | 1456 |

(4) [Web of Science](https://apps.webofknowledge.com/home.do?SID=6BQQjiiMCVa9MgFvRpC) core collection (1986 to Dec 29, 2019)

| **Search** | **Query** | **Items found** |
| --- | --- | --- |
| #1 | Subject words: (Chronic Obstructive Pulmonary Diseases) OR Subject words: (Chronic Obstructive Pulmonary Disease) OR Subject words: (Chronic Obstructive lung Disease) OR Subject words: (COPD) OR Subject words: (COAD) OR Subject words: (pulmonary disease, chronic obstructive) OR Subject words: (Chronic Obstructive Airway Disease) OR Subject words: (Chronic Airflow Obstruction) OR Subject words: (Chronic Airflow Obstructions) OR Subject words: (Airflow Obstruction, Chronic) OR Subject words: (Airflow Obstruction, Chronics) OR Subject words: (Lung Diseases, Obstructive) | 100244 |
| #2 | Subject words: (hospital patient) OR Subject words: (recurrent disease) OR Subject words: (Acute exacerbation) OR Subject words: (Symptom Flare Up) OR Subject words: (acute management) OR Subject words: (inpatients) OR Subject words: (inpatient) OR Subject words: (hospital admission) OR Subject words: (infective exacerbation) | 963799 |
| #3 | Subject words: (acute exacerbation of chronic obstructive pulmonary disease) OR Subject words: (AECOPD) OR Subject words: (acute exacerbation of COPD) OR Subject words: (exacerbation of COPD) | 15170 |
| #4 | #2 AND #1 | 17458 |
| #5 | #4 OR #3 | 24149 |
| #6 | Subject words: (rehabilitation) OR Subject words: (pulmonary rehabilitation) OR Subject words: (respiratory rehabilitation) OR Subject words: (Rehabilitation therapy) OR Subject words: (exercise therapy) OR Subject words: (rehabilitation training) OR Subject words: (rehabilitation program) OR Subject words: (kinesiotherapy) OR Subject words: (exercise) OR Subject words: (exercise training) OR Subject words: (breathing exercises) OR Subject words: (breathing exercise) OR Subject words: (breathing technique) OR Subject words: (exercise program) OR Subject words: (walking) OR Subject words: (aerobic training) OR Subject words: (resistance training) OR Subject words: (balance training) OR Subject words: (Strength Training) OR Subject words: (physical training) OR Subject words: (endurance training) OR Subject words: (muscle stretching exercises) OR Subject words: (stretching exercise) OR Subject words: (stretch training) OR Subject words: (upper limb training) | 958773 |
| #7 | Subject words: (interval training) OR Subject words: (Inspiratory Muscle Training) OR Subject words: (Flexibility Training) OR Subject words: (Neuromuscular Electrical Stimulation) OR Subject words: (implantable neurostimulator) OR Subject words: (physiotherapy) OR Subject words: (physical therapy) OR Subject words: (respiratory physiotherapy) OR Subject words: (respiratory physical therapy) OR Subject words: (airway clearance) OR Subject words: (lung clearance) OR Subject words: (education) OR Subject words: (psychoeducation) OR Subject words: (psychosocial support) OR Subject words: (psychosocial care) OR Subject words: (self-management) OR Subject words: (self care) OR Subject words: (Nutrition Support) OR Subject words: (nutrition supplement) OR Subject words: (nutrition therapy) OR Subject words: (diet therapy) OR Subject words: (Nutritional intervention) OR Subject words: (Enteral nutrition) OR Subject words: (enteric feeding) OR Subject words: (Parenteral nutrition) | 1512174 |
| #8 | Subject words: (randomized controlled trial) OR Subject words: (RCTs) OR Subject words: (RCT) OR Subject words: (controlled clinical trial) OR Subject words: (randomization) OR Subject words: (randomized) OR Subject words: (randomly) | 1350122 |
| #9 | #7 OR #6 | 2341593 |
| #10 | #9 AND #5 | 4801 |
| #11 | #10 AND #8 | 1343 |

**Appendix 2**

**Characteristics of excluded studies**

| **Author,Year** | **Tittle** | **Reasons** |
| --- | --- | --- |
| Ali, M. S,  20121 | Controlled trial of short term (3 WEEKS) pulmonary rehabilitation in copd following acute exacerbation. | meeting abstracts  (3) |
| Andrews, S. M,  20152 | Pulmonary rehabilitation maintenance program prevents accelerated FEV1 decline and may prevent exacerbations in patients with severe COPD. |
| Kjaergaard, J. L,  20183 | Early pulmonary rehabilitation after acute exacerbation of COPD. |
| Giavedoni S,  20124 | Neuromuscular electrical stimulation prevents muscle function deterioration in exacerbated COPD: A pilot study | not RCTs  (2) |
| Kofod LM,  20175 | Resistance Training With Ankle Weight Cuffs Is Feasible in Patients With Acute Exacerbation of COPD. |
| [Jing Yi](https://pubmed.ncbi.nlm.nih.gov/?sort=date&size=200&term=Yi+J&cauthor_id=32957331),  20206 | Effect of Sitting and Lying Liuzijue for Lung Rehabilitation in AECOPD Patients with Non-invasive Ventilation: study Protocol for a Randomized Controlled Trial | study protocol  (4) |
| Fernández-Jané, C.  20197 | Acupoint transcutaneous electrical nerve stimulation in hospitalized COPD patients with severe dyspnoea: study protocol for a randomized controlled trial |
| Prieur, G.,  20178 | Effect of high-flow nasal therapy during acute aerobic exercise in patients with chronic obstructive pulmonary disease after exacerbation: protocol for a randomised, controlled, cross-over trial |
| Frei, A,  20199 | Effects of a long-term home-based exercise training programme using minimal equipment vs. usual care in COPD patients: a study protocol for two multicentre randomised controlled trials (HOMEX-1 and HOMEX-2 trials) |
| Lainscak M,  201310 | Discharge Coordinator Intervention Prevents Hospitalizations in Patients With COPD: A Randomized Controlled Trial | irrelevant outcomes  (1) |
| Johnson-Warrington V,  201611 | Can a supported self-management program for COPD upon hospital discharge reduce readmissions? A randomized controlled trial. | include participants after 3 days of the AECOPD onset (27) |
| Puhan MA,  201212 | Early versus late pulmonary rehabilitation in chronic obstructive pulmonary  disease patients with acute exacerbations: a randomized trial. |
| Ali MS,  201413 | The effect of a short-term pulmonary rehabilitation on exercise capacity and quality of  life in patients hospitalised with acute exacerbation of chronic obstructive pulmonary disease. |
| Babu AS,  201014 | The effects of “on-call/out of hours” physical therapy in acute exacerbations of chronic obstructive pulmonary disease: a randomized controlled trial. |
| Chaplin EJL,  201315 | Neuromuscular stimulation of quadriceps in patients hospitalised during an exacerbation of COPD: a comparison of low (35 Hz) and high (50 Hz) frequencies. |
| Deepak T,  201416 | Outcome of pulmonary rehabilitation in patients after acute exacerbation of chronic obstructive pulmonary disease. |
| Eaton T,  200917 | Does early pulmonary rehabilitation reduce acute health-care utilization in COPD patients admitted with an exacerbation? A randomized controlled study. |
| Kirsten D,  199818 | Exercise training improves recovery in patients with COPD after an acute exacerbation. |
| Ko FW, 201119 | Effect of early pulmonary rehabilitation on health care utilization and health status in patients hospitalized with acute exacerbations of COPD. |
| Liao L-Y,  201520 | Efficacy of a respiratory rehabilitation exercise training package in hospitalized elderly patients with acute exacerbation of COPD: a randomized control trial. |
| Man WD,  200421 | Community pulmonary rehabilitation after hospitalisation for acute exacerbations of chronic obstructive pulmonary disease: randomised controlled study. |
| Cruz J,  201422 | Home telemonitoring in COPD: A systematic review of methodologies and patients' adherence. |
| Murphy N,  200523 | Extending a home from hospital care programme for COPD exacerbations to include pulmonary rehabilitation. |
| Janaudis-Ferreira T,  201824 | Can patients with COPD assimilate disease-specific information during an acute exacerbation? Results of a pilot randomized controlled trial. |
| Seymour JM,201025 | Outpatient pulmonary rehabilitation following acute exacerbations ofCOPD. |
| Song HY,  201426 | Effectiveness of a brief self-care support intervention for pulmonary rehabilitation among the elderly patients with chronic obstructive pulmonary disease in Korea. |
| Kjærgaard JL.  202027 | Early pulmonary rehabilitation after acute exacerbation of COPD: a randomised controlled trial. |
| Garcia-Aymerich J,  200728 | Effects of an integrated care intervention on risk factors of COPD readmission. |
| Kodric M,  200929 | The effectiveness of a bronchial drainage technique (ELTGOL) in COPD exacerbations. |
| Eastwood B,  201630 | Challenges of undertaking a clinical trial using bubble-PEP in an acute exacerbation of chronic obstructive pulmonary disease: a feasibility study. |
| Basri R,  201731 | Short-term effects of chest physiotherapy in acute exacerbation of chronic obstructive pulmonary disease. |
| Yohannes AM,  200332 | Early mobilization with walking aids following hospital admission with acute exacerbation of chronic obstructive pulmonary disease. |
| Bellone A,  200233 | Short-term effects of expiration under positive pressure in patients with acute exacerbation of chronic obstructive pulmonary disease and mild acidosis requiring non-invasive positive pressure ventilation. |
| Valenza MC,  201434 | Effectiveness of controlled breathing techniques on anxiety and depression in hospitalized patients with COPD: a randomized clinical trial. |
| Hernandez C,  200335 | Home hospitalisation of exacerbated chronic obstructive pulmonary disease patients. |
| Lainscak M,  201336 | Discharge coordinator intervention prevents hospitalizations in patients with COPD: a randomized controlled trial. |
| Aboumatar H,  201937 | Effect of a hospital-initiated program combining transitional care and long-term self-management support on outcomes of patients hospitalized with chronic obstructive pulmonary disease: a randomized clinical trial. |

**References:**

1. Ali M S, Talwar D, Singh R K, et al. Controlled Trial Of Short Term (3 Weeks) Pulmonary Rehabilitation In COPD Following Acute Exacerbation. American Thoracic Society International Conference 2012.
2. Andrews S M, Deoghare H V, Mills P K, et al. Pulmonary Rehabilitation Maintenance Program May Prevent Accelerated FEV1 Decline in Patients With COPD. Clinical Pulmonary Medicine, 2017,24(4),143-148.
3. Kjærgaard JL, Juhl CB, Lange P, Wilcke JT. Early pulmonary rehabilitation after acute exacerbation of COPD: a randomised controlled trial. ERJ Open Res. 2020;6(1):00173-2019.
4. Giavedoni S, Deans A, McCaughey P, et al. Neuromuscular electrical stimulation prevents muscle function deterioration in exacerbated COPD: a pilot study. Respir Med. 2012;106(10):1429-34.
5. Kofod LM, Døssing M, Steentoft J. Resistance Training With Ankle Weight Cuffs Is Feasible in Patients With Acute Exacerbation of COPD. J Cardiopulm Rehabil Prev. 2017;37(1):49-56.
6. Yi J, Wang F, Yue R, et al. Effect of sitting and lying Liuzijue for lung rehabilitation in acute exacerbation of chronic obstructive pulmonary disease patients with non-invasive ventilation: Study protocol for a randomized controlled trial. Medicine (Baltimore). 2020;99(38):e22111.
7. Fernández-Jané C, Vilaró J. Acupoint transcutaneous electrical nerve stimulation in hospitalized COPD patients with severe dyspnoea: study protocol for a randomized controlled trial. Trials. 2019;20(1):707.
8. Prieur G, Medrinal C, Combret Y, et al. Effect of high-flow nasal therapy during acute aerobic exercise in patients with chronic obstructive pulmonary disease after exacerbation: protocol for a randomised, controlled, cross-over trial. BMJ Open Respir Res. 2017;4(1):e000191.
9. Frei A, Radtke T, Dalla Lana K, et al. Effects of a long-term home-based exercise training programme using minimal equipment vs. usual care in COPD patients: a study protocol for two multicentre randomised controlled trials (HOMEX-1 and HOMEX-2 trials). BMC Pulm Med. 2019;19(1):57.
10. Lainscak M, Kadivec S, Kosnik M, et al. Discharge coordinator intervention prevents hospitalizations in patients with COPD: a randomized controlled trial. J Am Med Dir Assoc. 2013;14(6):450.e1-6.
11. Johnson-Warrington V, Rees K, Gelder C, et al. Can a supported self-management program for COPD upon hospital discharge reduce readmissions? A randomized controlled trial. Int J Chron Obstruct Pulmon Dis. 2016;11:1161-9.
12. Puhan MA, Spaar A, Frey M, et al. Early versus late pulmonary rehabilitation in chronic obstructive pulmonary disease patients with acute exacerbations: a randomized trial. Respiration. 2012;83(6):499-506.
13. Ali MS, Talwar D, Jain SK. The effect of a short-term pulmonary rehabilitation on exercise capacity and quality of life in patients hospitalised with acute exacerbation of chronic obstructive pulmonary disease. Indian J Chest Dis Allied Sci. 2014;56(1):13-9.
14. Babu AS, Noone MS, Haneef M, et al. The effects of 'on-call/out of hours' physical therapy in acute exacerbations of chronic obstructive pulmonary disease: a randomized controlled trial. Clin Rehabil. 2010;24(9):802-9.
15. Chaplin EJ, Houchen L, Greening NJ, et al. Neuromuscular stimulation of quadriceps in patients hospitalised during an exacerbation of COPD: a comparison of low (35 Hz) and high (50 Hz) frequencies. Physiother Res Int. 2013;18(3):148-56.
16. Deepak TH, Mohapatra PR, Janmeja AK Outcome of pulmonary rehabilitation in patients after acute exacerbation of chronic obstructive pulmonary disease. Indian J Chest Dis Allied Sci. 2014;56(1):7-12.
17. Eaton T, Young P, Fergusson W Does early pulmonary rehabilitation reduce acute health-care utilization in COPD patients admitted with an exacerbation? A randomized controlled study. Respirology. 2009 ;14(2):230-8.
18. Kirsten DK, Taube C, Lehnigk B, et al. Exercise training improves recovery in patients with COPD after an acute exacerbation. Respir Med. 1998;92(10):1191-8.
19. Ko FW, Dai DL, Ngai J, et al. Effect of early pulmonary rehabilitation on health care utilization and health status in patients hospitalized with acute exacerbations of COPD. Respirology. 2011;16(4):617-24.
20. Liao LY, Chen KM, Chung WS, et al. Efficacy of a respiratory rehabilitation exercise training package in hospitalized elderly patients with acute exacerbation of COPD: a randomized control trial. Int J Chron Obstruct Pulmon Dis. 2015;10:1703-9.
21. Man WD, Polkey MI, Donaldson N, et al. Community pulmonary rehabilitation after hospitalisation for acute exacerbations of chronic obstructive pulmonary disease: randomised controlled study. BMJ. 2004;329(7476):1209.
22. Cruz J, Brooks D, Marques A. Home telemonitoring in COPD: a systematic review of methodologies and patients' adherence. Int J Med Inform. 2014;83(4):249-63.
23. Murphy N, Bell C, Costello RW. Extending a home from hospital care programme for COPD exacerbations to include pulmonary rehabilitation. Respir Med. 2005;99(10):1297-302.
24. Janaudis-Ferreira T, Carr SJ, Harrison SL, et al. Can Patients With COPD Assimilate Disease-Specific Information During an Acute Exacerbation?: Results of a Pilot Randomized Controlled Trial. Chest. 2018;154(3):588-596.
25. Seymour JM, Moore L, Jolley CJ, et al. Outpatient pulmonary rehabilitation following acute exacerbations of COPD. Thorax. 2010;65(5):423-8.
26. Song HY, Yong SJ, Hur HK. Effectiveness of a brief self-care support intervention for pulmonary rehabilitation among the elderly patients with chronic obstructive pulmonary disease in Korea. Rehabil Nurs. 2014;39(3):147-56.
27. Kjærgaard JL, Juhl CB, Lange P, et al. Early pulmonary rehabilitation after acute exacerbation of COPD: a randomised controlled trial. ERJ Open Res. 2020;6(1):00173-2019.
28. Garcia-Aymerich J, Hernandez C, Alonso A, et al. Effects of an integrated care intervention on risk factors of COPD readmission. Respir Med. 2007;101(7):1462-9.
29. Kodric M, Garuti G, Colomban M , et al. The effectiveness of a bronchial drainage technique (ELTGOL) in COPD exacerbations. Respirology. 2009;14(3):424-8.
30. Eastwood B, Jepsen N, Coulter K, et al. Challenges of undertaking a clinical trial using bubble-PEP in an acute exacerbation of chronic obstructive pulmonary disease: a feasibility study. NZ J Physiother 2016; 44: 8–16.
31. Basri R, Tahir M, Naseem M. Short-term effects of chest physiotherapy in acute exacerbation of chronic obstructive pulmonary disease. J Med Sci 2017; 25: 323–327.
32. Yohannes AM, Connolly MJ. Early mobilization with walking aids following hospital admission with acute exacerbation of chronic obstructive pulmonary disease. Clin Rehabil 2003; 17: 465–471.
33. Bellone A, Spagnolatti L, Massobrio M, et al. Short-term effects of expiration under positive pressure in patients with acute exacerbation of chronic obstructive pulmonary disease and mild acidosis requiring non-invasive positive pressure ventilation. Intensive Care Med 2002; 28: 581–585.
34. Valenza MC, Valenza-Peña G, Torres-Sánchez I, et al. Effectiveness of controlled breathing techniques on anxiety and depression in hospitalized patients with COPD: a randomized clinical trial. Respir Care 2014; 59: 209–215.
35. Hernandez C, Casas A, Escarrabill J, et al. Home hospitalisation of exacerbated chronic obstructive pulmonary disease patients. Eur Respir J 2003; 21: 58–67.
36. Lainscak M, Kadivec S, Kosnik M, et al. Discharge coordinator intervention prevents hospitalizations in patients with COPD: a randomized controlled trial. J Am Med Dir Assoc 2013; 14: 450.
37. Aboumatar H, Naqibuddin M, Chung S, et al. Effect of a hospital-initiated program combining transitional care and long-term self-management support on outcomes of patients hospitalized with chronic obstructive pulmonary disease: a randomized clinical trial. JAMA 2019; 322: 1371–1380.
